# Supplementary material
Source: PubMed Central journal article supplement (PMC4327980)
Supplement: NIHMS636665-supplement.pdf [file NIHMS636665-supplement.pdf]

**Supplementary Material:** Treatment protocols used on this study

| Protocol    | Patient subgroup                                      | Induction chemo                                                                                          | RT                                                                                     | Chemo concurrent with RT                                         | Post-RT chemo                                                          | Maintenance chemo                                                        | Continuation chemo                                                   | Ref                      |
|-------------|-------------------------------------------------------|----------------------------------------------------------------------------------------------------------|----------------------------------------------------------------------------------------|------------------------------------------------------------------|------------------------------------------------------------------------|--------------------------------------------------------------------------|----------------------------------------------------------------------|--------------------------|
| ACNS0333    | IT M0<br>≥ 6mo<br>or<br>ST M0<br>≥ 12 mo              | MTX,<br>VCR,<br>Etoposide,<br>CYC,<br>CDDP x<br>2c                                                       | Focal RT to 50.4 –<br>54 Gy                                                            | None                                                             | Thiotepa,<br>carbo,<br>PBSC<br>rescue x<br>3c                          | None                                                                     | None                                                                 | ACNS<br>0333<br>protocol |
|             | IT M0<br>< 6 mo<br>or<br>ST M0<br>< 12 mo<br>or<br>M+ | MTX,<br>VCR,<br>Etoposide,<br>CYC,<br>CDDP x<br>2c then<br>Thiotepa,<br>carbo,<br>PBSC<br>rescue x<br>3c | M0: focal RT to<br>50.4 Gy<br><br>M+: CSI to 23.4 –<br>36 Gy                           | None                                                             | None                                                                   | None                                                                     | None                                                                 |                          |
| DFCI 02-294 |                                                       | Doxo,<br>VCR,<br>CYC,<br>CDDP x<br>2c; IT<br>MTX,<br>HC,<br>cytarabine                                   | M0: focal RT to 54<br>Gy<br><br>M+, age ≥ 3 yo: CSI<br>to 36 Gy then boost<br>to 54 Gy | Etoposide,<br>VCR,<br>CYC,<br>CDDP; IT<br>MTX, HC,<br>cytarabine | VCR,<br>doxo or<br>dact, CYC<br>x 2 c; IT<br>MTX,<br>HC,<br>cytarabine | Tem, dact or<br>doxo, VCR,<br>CYC, x 8c;<br>IT MTX,<br>HC,<br>cytarabine | VCR, CYC,<br>+/- doxo or<br>dact, x 3c; IT<br>MTX, HC,<br>cytarabine | [1]                      |

|         |                                    |                               |                                                                                                                                                                         |      |                                                                       |                |      |                 |
|---------|------------------------------------|-------------------------------|-------------------------------------------------------------------------------------------------------------------------------------------------------------------------|------|-----------------------------------------------------------------------|----------------|------|-----------------|
| EU-RHAB |                                    | Doxo/ICE /VCA, IVENT MTX x 6c | Postpone until >18 mo; M0: focal RT to 54 Gy<br><br>M+, > 18 mo but < 3yo: CSI to 24 Gy at 1.6 Gy/d, boost to 54 Gy<br><br>M+ and > 3yo: CSI to 35.2 Gy, boost to 54 Gy | None | Doxo/ICE/ VCA, IVENT MTX x 3c or HDC, autologous stem cell transplant | Selected cases | None | [2]             |
| SJMB03  | ≥ 3 yo, M0, and < 1.5 cc residual  | None                          | CSI to 23.4 Gy then boost to 55.8 Gy                                                                                                                                    | None | HDC (VCR, CDDP, CYC) x4c with PBSC support                            | None           | None | SJMB03 protocol |
|         | ≥ 3 yo and M+ or ≥ 1.5 cc residual | None                          | CSI to 36 – 39.6 Gy then boost to 55.8 Gy                                                                                                                               | None | HDC (VCR, CDDP, CYC) x 4c with PBSC support                           | None           | None |                 |

IT, infratentorial; ST, supratentorial; M0, no metastatic disease; M+, any metastatic disease; c, cycle ; MTX, methotrexate; mo, months old; yo, years old; cc, cubic centimeters; CSI, craniospinal irradiation; RT, radiotherapy; VCR, vincristine; CYC, cyclophosphamide; CDDP, cisplatin; HDC, high-dose chemotherapy; PBSC, peripheral blood stem cells; Doxo, doxorubicin; ICE, ifosfamide, carboplatin, etoposide; IVENT, intraventricular; carbo, carboplatin; Tem, temozolamide; dact, dactinomycin; IT, intrathecal; HC, hydrocortisone; VCA, vincristine, cyclophosphamide, actinomycin D; d, day

## References

1. Chi SN, Zimmerman MA, Yao X, et al. Intensive multimodality treatment for children with newly diagnosed cns atypical teratoid rhabdoid tumor. *Journal of clinical oncology : official journal of the American Society of Clinical Oncology* 2009;27:385-389.
2. Benesch M, Bartelheim K, Fleischhack G, et al. High-dose chemotherapy (hdct) with auto-sct in children with atypical teratoid/rhabdoid tumors (at/rt): A report from the european rhabdoid registry (eu-rhab). *Bone marrow transplantation* 2014;49:370-375.
